# Supplementary material for: Hydrogen peroxide in the upper tropical troposphere over the Atlantic Ocean and western Africa during the CAFE-Africa aircraft campaign
Source: Copernicus journal article supplement (doi:10.5194/acp-2022-693), 2022-10-18
Supplement: Supplementary file 1 [file acp-2022-693-supplement.pdf]

Supplement of  
**Hydrogen peroxide in the upper tropical troposphere over the Atlantic Ocean and western Africa during CAFE-Africa aircraft campaign**

5 Zaneta Hamryszczak<sup>1</sup>, Dirk Dienhart<sup>1</sup>, Bettina Brendel<sup>1</sup>, Roland Rohloff<sup>1</sup>, Daniel Marno<sup>1</sup>, Monica Martinez<sup>1</sup>, Hartwig Harder<sup>1</sup>, Andrea Pozzer<sup>1,4</sup>, Birger Bohn<sup>2</sup>, Martin Zöger<sup>3</sup>, Jos Lelieveld<sup>1,4</sup> and Horst Fischer<sup>1</sup>

<sup>1</sup>Atmospheric Chemistry Department, Max Planck Institute for Chemistry, Mainz, 55128, Germany

<sup>2</sup>Institute of Energy and Climate Research, IEK-8: Troposphere, Forschungszentrum Jülich GmbH, Jülich, 52428, Germany

10 <sup>3</sup>Flight Experiments, German Aerospace Center (DLR), Oberpfaffenhofen, 82234 Germany

<sup>4</sup>Climate and Atmosphere Research Center, The Cyprus Institute, Nicosia, 1645, Cyprus

*Correspondence:* Zaneta Hamryszczak (z.hamryszczak@mpic.de) and Horst Fischer (horst.fischer@mpic.de)

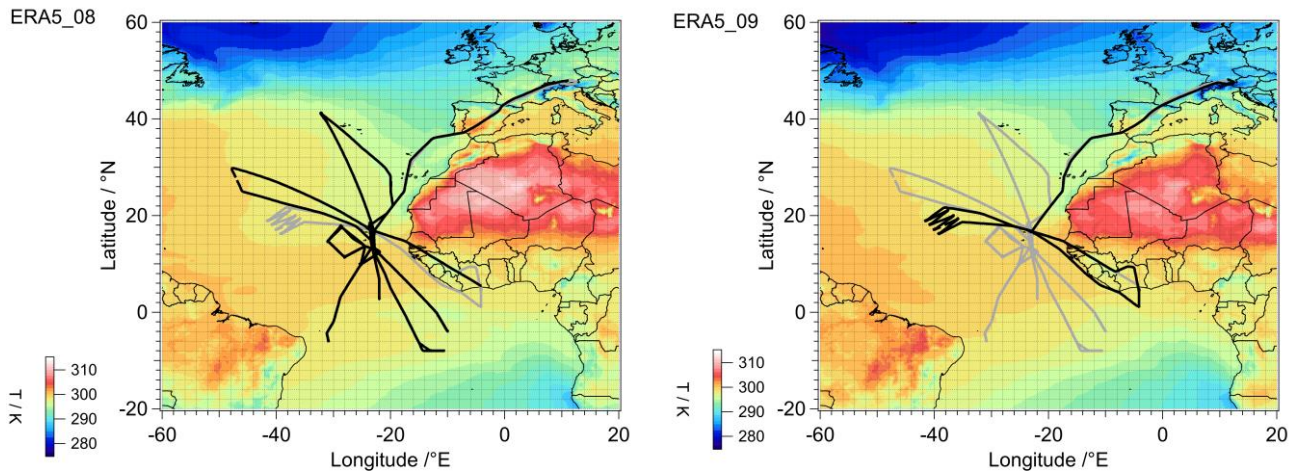

20 **Figure S1. Average 2 m dewpoint temperature during the campaign CAFE-Africa in August (left) and September (right) 2018 based on ERA5 data output (contains modified Copernicus Climate Change Service information; Hersbach et al. 2019; Accessed on < 22-07-2022 >)<sup>1</sup>. The performed flights are indicated in black.**

---

<sup>1</sup> Hersbach, H., Bell, B., Berrisford, P., Biavati, G., Horányi, A., Muñoz Sabater, J., Nicolas, J., Peubey, C., Radu, R., Rozum, I., Schepers, D., Simmons, A., Soci, C., Dee, D., Thépaut, J-N. (2019): ERA5 monthly averaged data on single levels from 1959 to present. Copernicus Climate Change Service (C3S) Climate Data Store (CDS). (Accessed on < 22-07-2022 >), 10.24381/cds.f17050d7

25

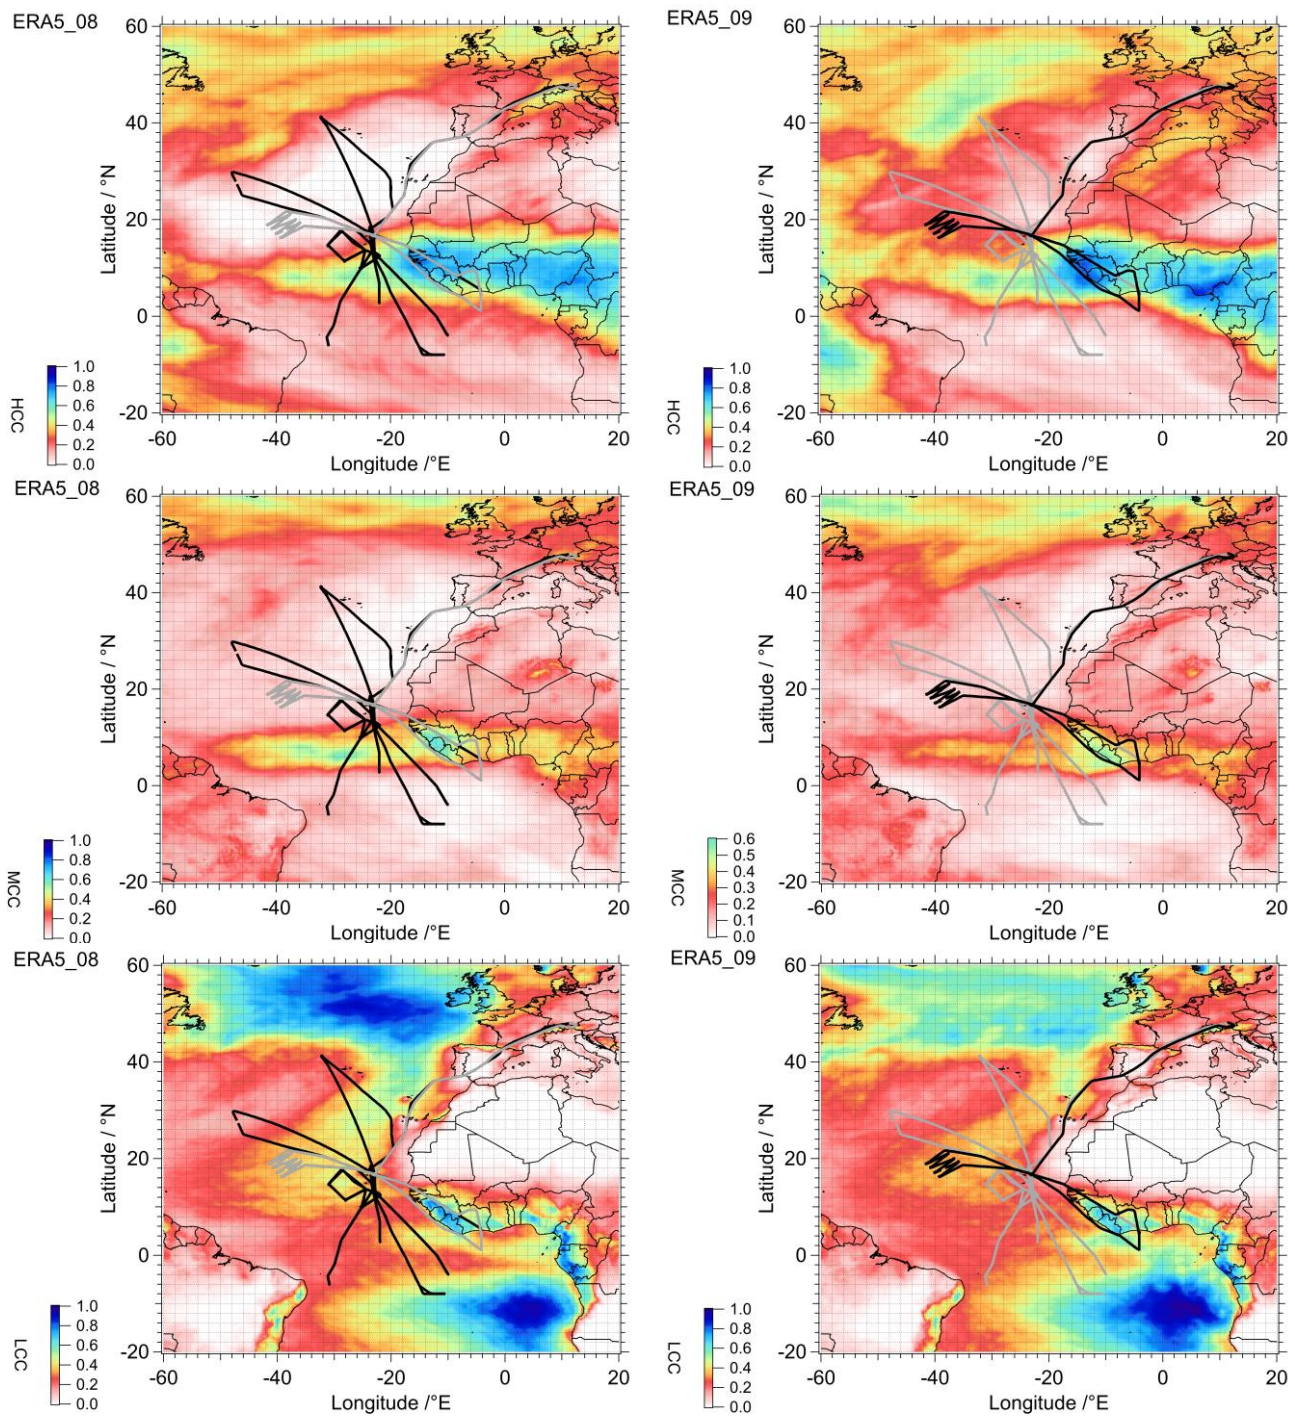

**Figure S2. Average high, medium and low (top to bottom panels) cloud coverage during the campaign CAFE-Africa in August (left panel) and September (right panel) 2018 based on ERA5 data output (modified Copernicus Climate**

30 **Change Service information; Hersbach et al. 2019; Accessed on < 22-07-2022 >**<sup>2</sup>. The performed flights are indicated in black. Please note the approximate altitudinal range of low, medium and high cloud cover at 0–2, 2–6, >6 km, respectively.

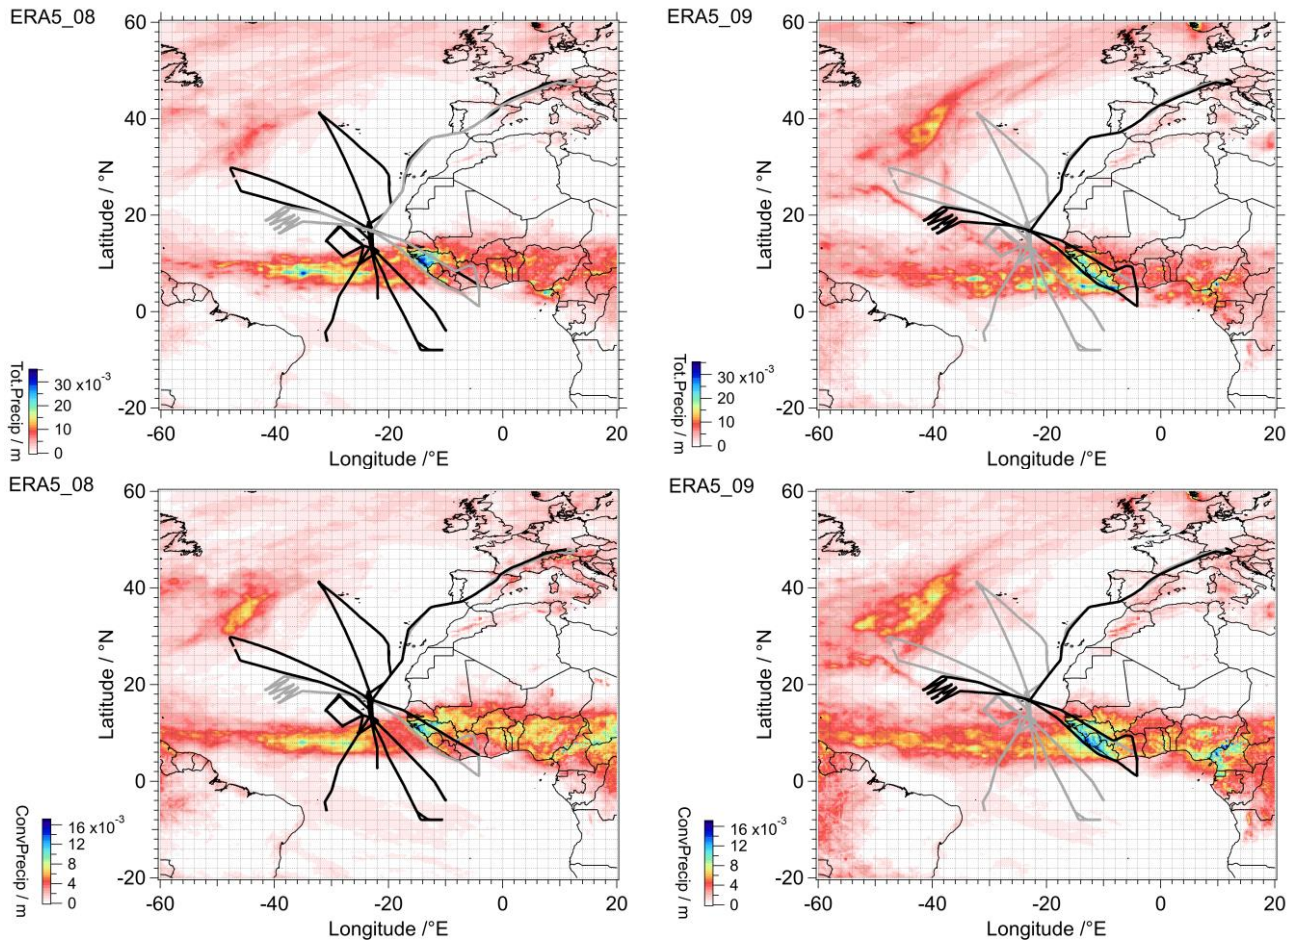

35 **Figure S3. Average total and convective precipitation (top to bottom panels) during CAFE-Africa in August (left panel) and September (right panel) 2018 based on ERA5 datasets (contains modified Copernicus Climate Change Service information; Hersbach et al. 2019; Accessed on < 22-07-2022 >**<sup>3</sup>. The performed flights are indicated in black.

<sup>2</sup> Hersbach, H., Bell, B., Berrisford, P., Biavati, G., Horányi, A., Muñoz Sabater, J., Nicolas, J., Peubey, C., Radu, R., Rozum, I., Schepers, D., Simmons, A., Soci, C., Dee, D., Thépaut, J-N. (2019): ERA5 monthly averaged data on single levels from 1959 to present. Copernicus Climate Change Service (C3S) Climate Data Store (CDS). (Accessed on < 22-07-2022 >), [10.24381/cds.f17050d7](https://doi.org/10.24381/cds.f17050d7)

<sup>3</sup> Hersbach, H., Bell, B., Berrisford, P., Biavati, G., Horányi, A., Muñoz Sabater, J., Nicolas, J., Peubey, C., Radu, R., Rozum, I., Schepers, D., Simmons, A., Soci, C., Dee, D., Thépaut, J-N. (2019): ERA5 monthly averaged data on single levels from 1959 to present. Copernicus Climate Change Service (C3S) Climate Data Store (CDS). (Accessed on < 22-07-2022 >), [10.24381/cds.f17050d7](https://doi.org/10.24381/cds.f17050d7)

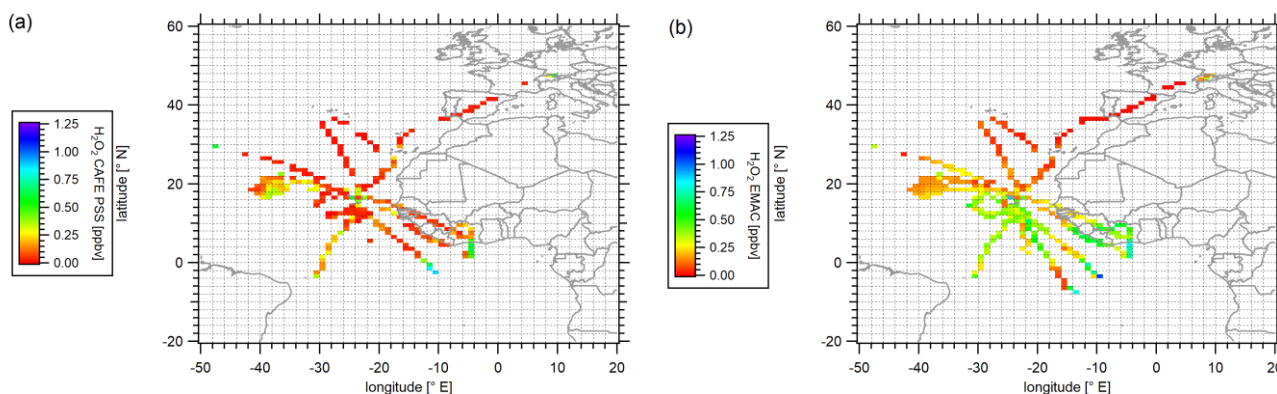

40 **Figure S4. Spatial distribution of hydrogen peroxide modelled based on photostationary steady state conditions (a) and**  
**simulated by the model EMAC (b) in the upper troposphere ( $\geq 8$  km) during CAFE-Africa campaign. Data were binned**  
**into  $1^\circ \times 1^\circ$  bins over the full extension of the flight tracks.**

45 **Table S1. General mean ( $\pm 1$  sigma) and median overview of measured, simulated and modelled based on steady state**  
**conditions hydrogen peroxide mixing ratios subdivided into northern (approx.  $20^\circ\text{N}$  -  $40^\circ\text{N}$ ; top) hemisphere, ITCZ**  
**(approx.  $5^\circ\text{N}$  <  $20^\circ\text{N}$ ; middle) and southern hemisphere (approx.  $-10^\circ\text{N}$  <  $5^\circ\text{N}$ ; bottom).**

#### Northern Hemisphere

|                                     | CAFE-Africa     | EMAC            | CAFE PSS        |
|-------------------------------------|-----------------|-----------------|-----------------|
| <b>Mean <math>\pm 1</math>sigma</b> | 0.14 $\pm$ 0.11 | 0.11 $\pm$ 0.08 | 0.08 $\pm$ 0.11 |
| <b>Median</b>                       | 0.12            | 0.11            | 0.04            |

#### Intertropical Convergence Zone

|                                     | CAFE-Africa     | EMAC            | CAFE PSS        |
|-------------------------------------|-----------------|-----------------|-----------------|
| <b>Mean <math>\pm 1</math>sigma</b> | 0.20 $\pm$ 0.13 | 0.35 $\pm$ 0.17 | 0.14 $\pm$ 0.15 |
| <b>Median</b>                       | 0.17            | 0.33            | 0.08            |

#### Southern Hemisphere

|                                     | CAFE-Africa     | EMAC            | CAFE PSS        |
|-------------------------------------|-----------------|-----------------|-----------------|
| <b>Mean <math>\pm 1</math>sigma</b> | 0.15 $\pm$ 0.12 | 0.38 $\pm$ 0.24 | 0.31 $\pm$ 0.25 |
| <b>Median</b>                       | 0.12            | 0.31            | 0.25            |

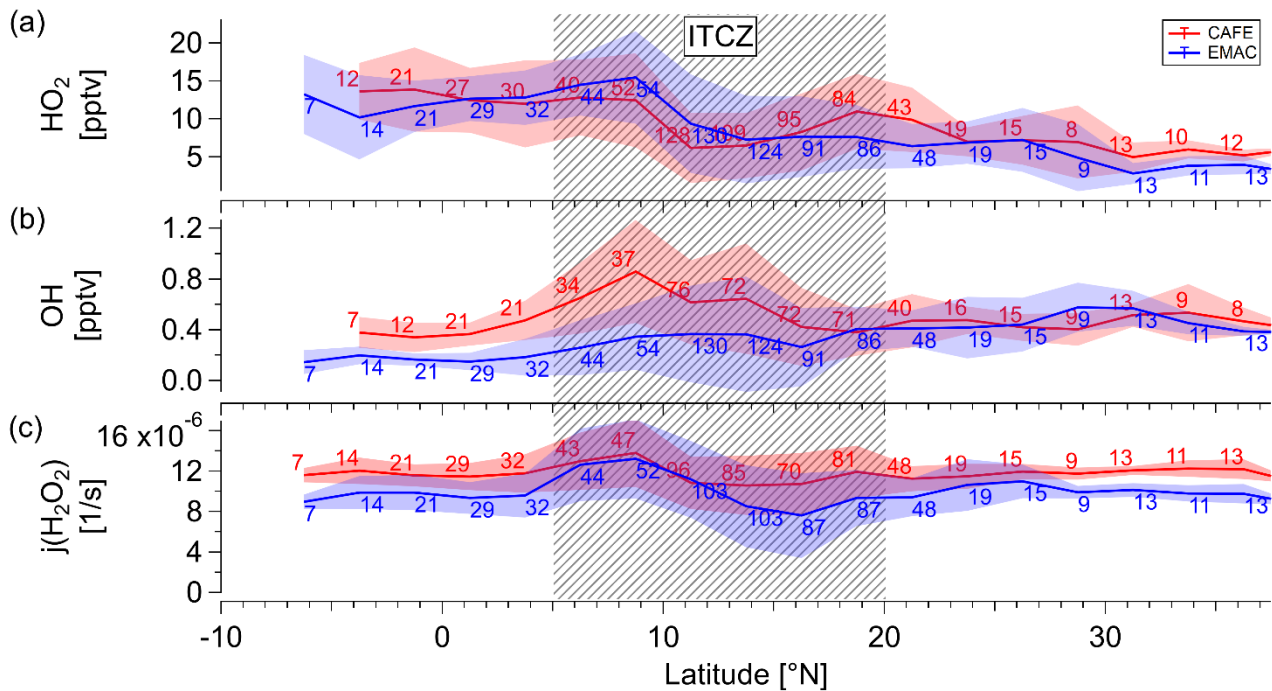

**Figure S5. Latitudinal dependence of measured (red) hydroperoxyl radical levels (a), hydroxyl radical concentrations (b) and hydrogen peroxide photolysis rates (c; mean  $\pm$  1 sigma) compared to EMAC simulations (blue). The data sets with 6 min time resolution and mean values were binned for 2.5° of latitude at altitudes  $\geq$  8 km. The corresponding numbers indicate the total amount of data points per bin. The shaded pattern marks the ITCZ.**

55

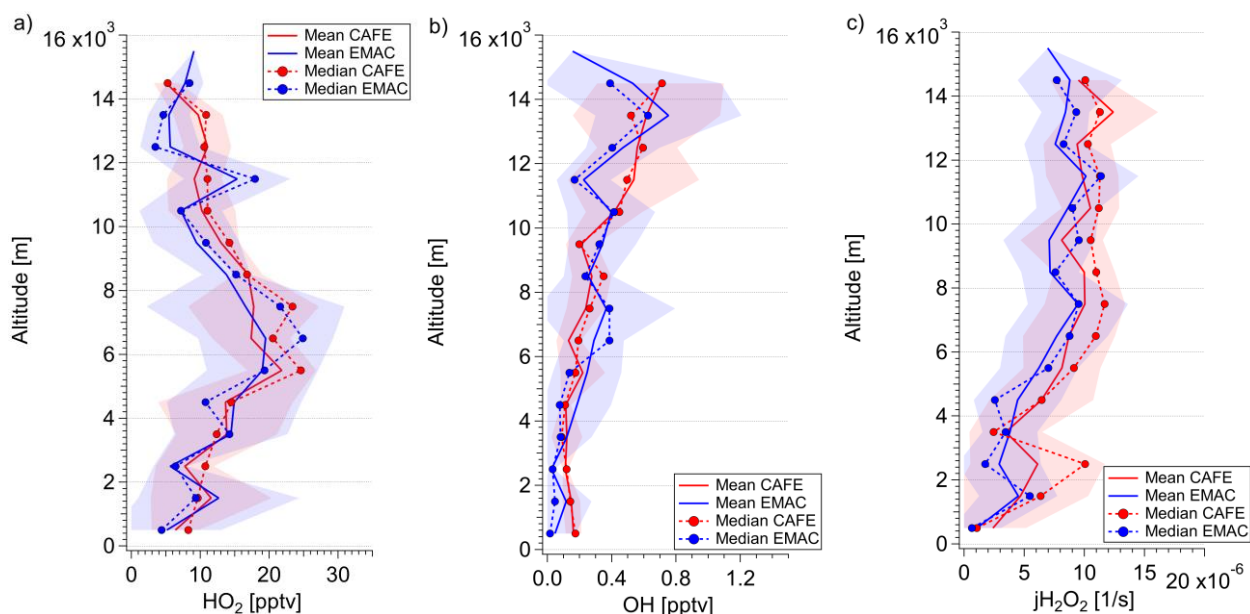

60 **Figure S6. Vertical profiles of observed (red) and simulated (blue) hydroperoxyl radical (a), hydroxyl radical (b) and hydrogen peroxide photolysis rates (c). Vertical profile estimations were calculated within 1000 m means and medians over the entire probed atmospheric column based on data obtained within the region of the base of operation in Sal, Cape Verde (approx. 16° 35' – 16° 51' N; -22° 52' - -23 °E).**

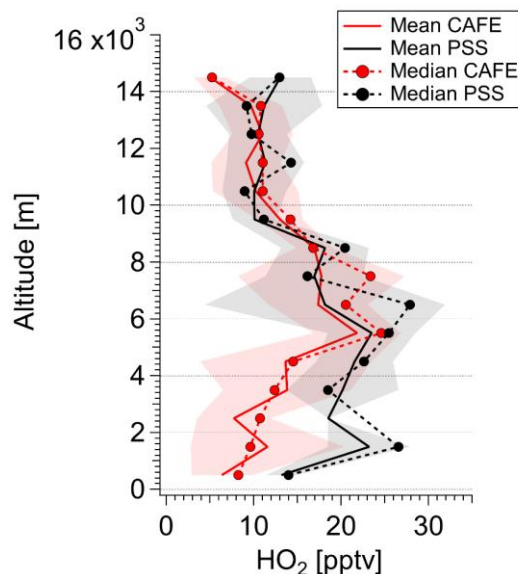

65 **Figure S7. Vertical profile of observed (red) and PSS calculated (black) hydroperoxyl radical calculated within 1000 m means and medians over the entire probed atmospheric column based on data obtained at the base of operation. Please note that the HO<sub>2</sub> PSS calculations are based on assumptions made in Eq. 6 in the manuscript.**

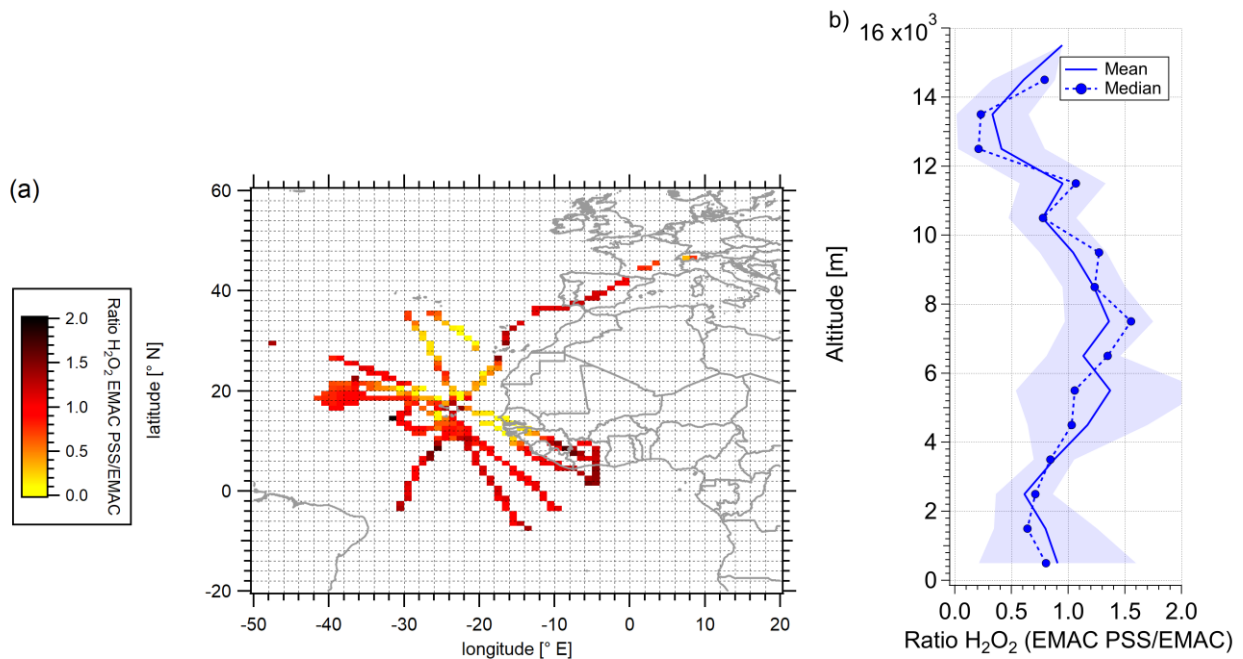

**Figure S8. Spatial distribution of  $\text{H}_2\text{O}_2(\text{PSS EMAC})/\text{H}_2\text{O}_2(\text{EMAC})$  ratio (a) and the corresponding vertical profile (b) in the upper troposphere ( $\geq 8$  km) during CAFE-Africa campaign. For the purposes of the spatial distribution analysis, data were binned into  $1^\circ \times 1^\circ$  bins over the full extension of the flight tracks. The vertical distribution was estimated within 1000 m altitude bins over the entire probed column based on the simulated data within the region of the base of operation in Sal, Cape Verde (approx.  $16^\circ 35' - 16^\circ 51' \text{ N}$ ;  $-22^\circ 52' - -23^\circ \text{ E}$ ).**

70

75
